# Supplementary material
Source: HighWire-hosted journal article supplement (https://bmjopen.bmj.com/content/12/8/e059327)
Supplement: inline-supplementary-material-1 [file inline-supplementary-material-1.pdf]

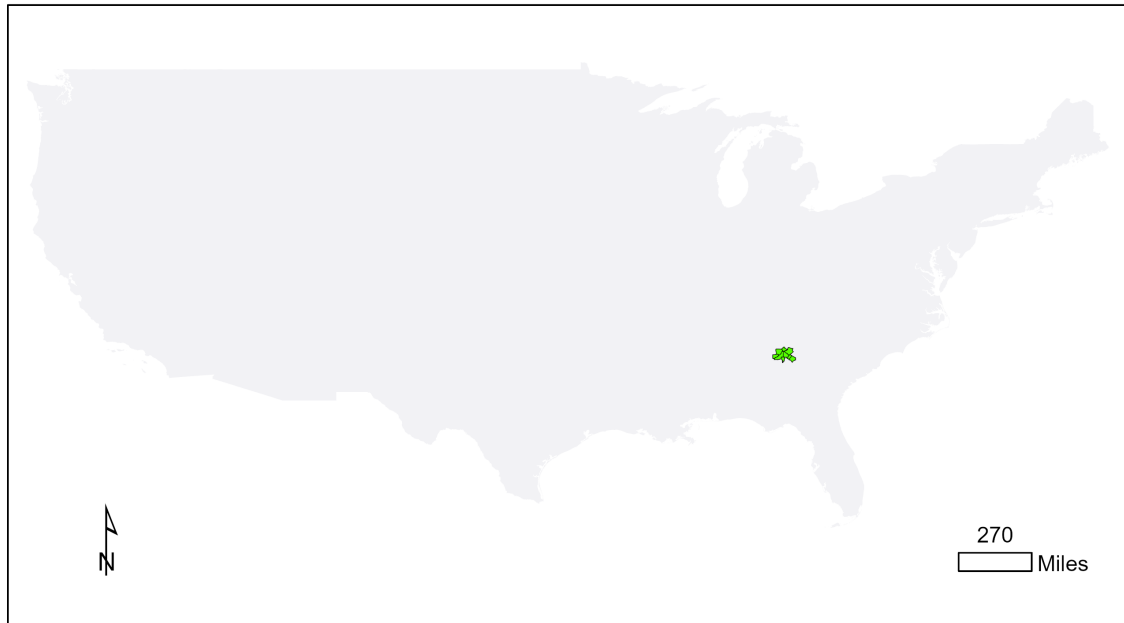

**eFigure 1.** Counties in Georgia Health District 3 contextualized in contiguous United States map.

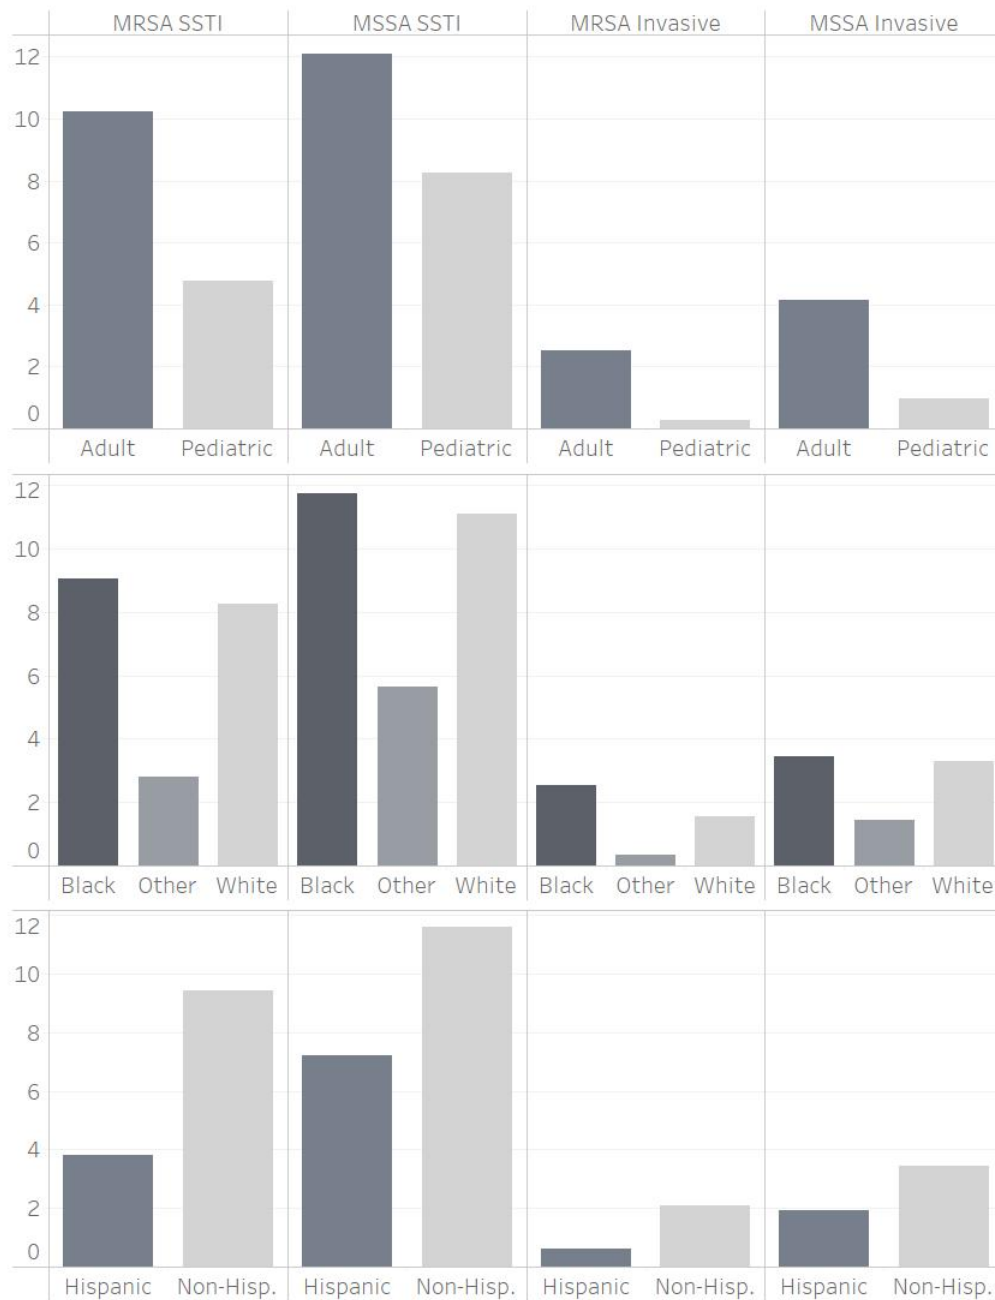

**eFigure 2.** Crude incidence rates (per population of 100,000) of invasive and skin and soft tissue *S. aureus* infections by resistance to methicillin, stratified by age group, race, and ethnicity. Created with Tableau (version 9.1).

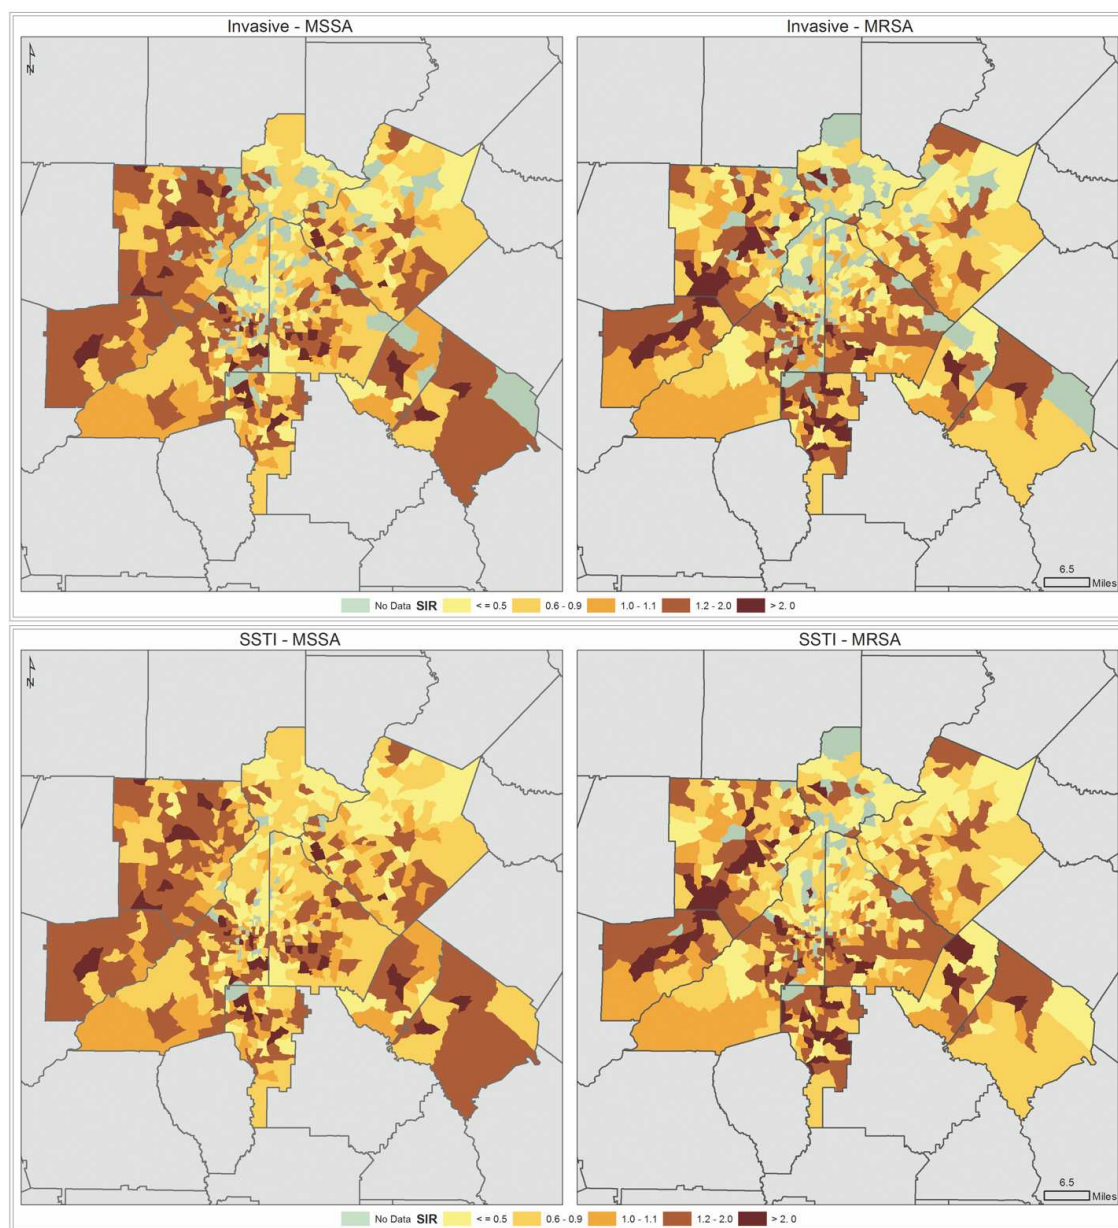

**eFigure 3.** Standardized incidence ratios of invasive and skin and soft tissue infections caused by *S. aureus* by methicillin-resistance standardized to overall HD3 infection-specific rate

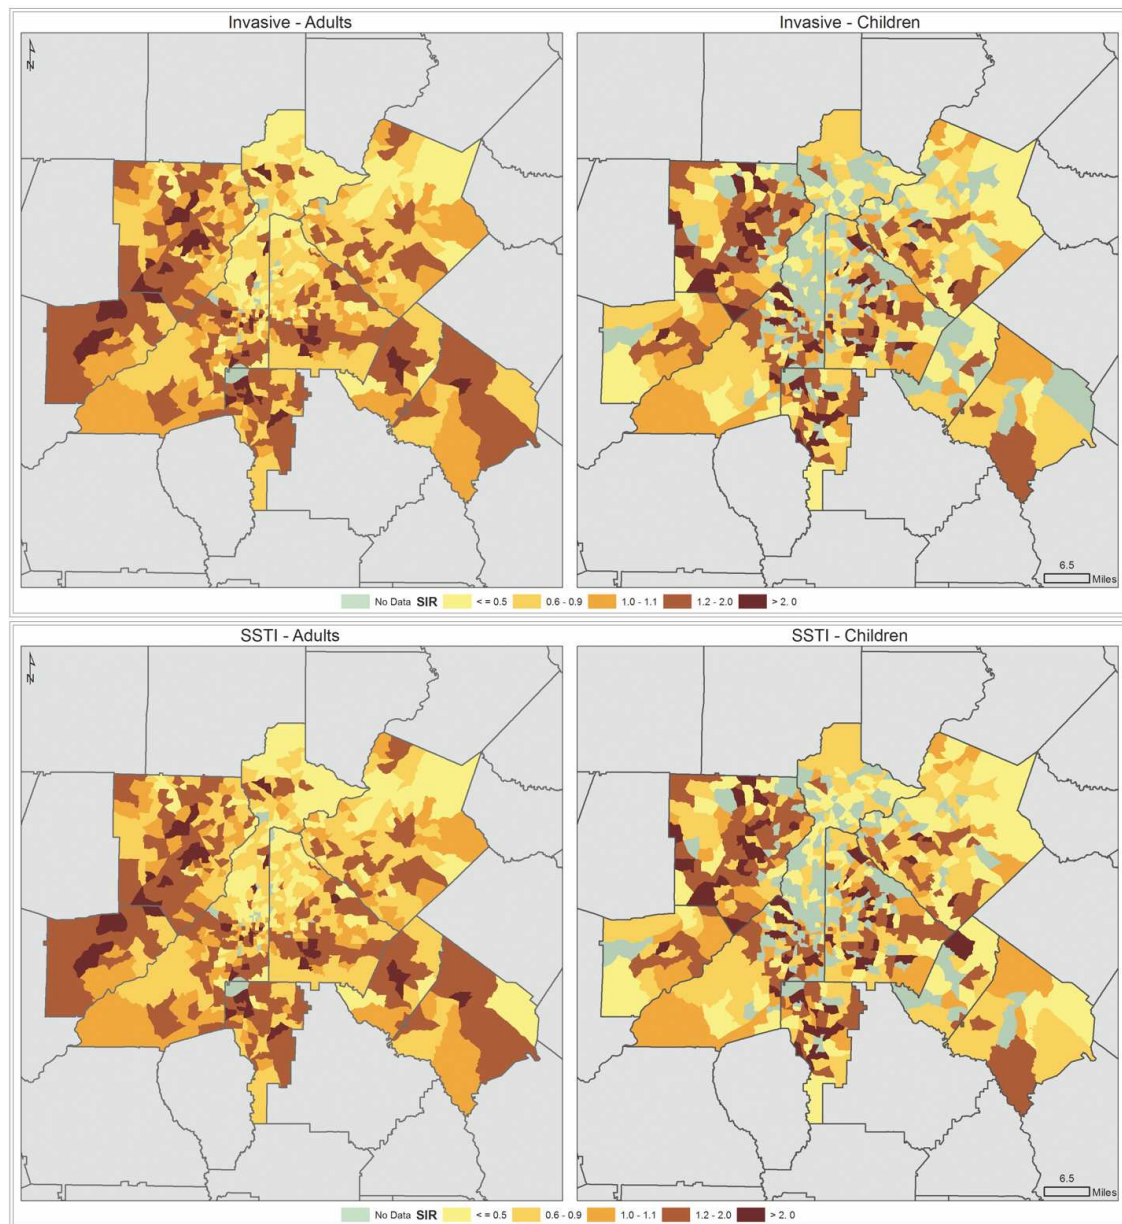

**eFigure 4.** Standardized incidence ratios of pediatric and adult *S. aureus* (MRSA or MSSA) infections by infection type standardized to overall incidence of age group rate for infection type
