# Supplementary material
Source: HighWire-hosted journal article supplement (https://bmjopen.bmj.com/content/12/8/e059327)
Supplement: inline-supplementary-material-2 [file inline-supplementary-material-2.pdf]

**Supplemental Table 1. Multiple imputation of demographics for incident *S. aureus* skin and soft tissue (n=7,800) and invasive (n=2,038) infections**

|                                  | All Case Analysis |          | Multiple Imputation 1 |          | Multiple Imputation 2 |          | Multiple Imputation 3 |          | Multiple Imputation 4 |          | Multiple Imputation 5 |          |
|----------------------------------|-------------------|----------|-----------------------|----------|-----------------------|----------|-----------------------|----------|-----------------------|----------|-----------------------|----------|
|                                  | SSTI              | Invasive | SSTI                  | Invasive | SSTI                  | Invasive | SSTI                  | Invasive | SSTI                  | Invasive | SSTI                  | Invasive |
| <b>Race</b>                      |                   |          |                       |          |                       |          |                       |          |                       |          |                       |          |
| American Indian/Alaska Native    | 21                | 4        |                       |          |                       |          |                       |          |                       |          |                       |          |
| Asian                            | 158               | 32       |                       |          |                       |          |                       |          |                       |          |                       |          |
| Black                            | 3,446             | 1,012    | 3,864                 | 1,045    | 3,838                 | 1,057    | 3,825                 | 1,049    | 3,882                 | 1,054    | 3,862                 | 1,054    |
| Native Hawaiian/Pacific-Islander | 13                | 8        |                       |          |                       |          |                       |          |                       |          |                       |          |
| White                            | 3,162             | 845      | 3,715                 | 943      | 3,744                 | 936      | 3,759                 | 943      | 3,702                 | 937      | 3,727                 | 937      |
| Unknown                          | 1,000             | 137      |                       |          |                       |          |                       |          |                       |          |                       |          |
| Other                            | -                 | -        | 221                   | 50       | 218                   | 45       | 216                   | 46       | 216                   | 47       | 211                   | 47       |
| <b>Ethnicity</b>                 |                   |          |                       |          |                       |          |                       |          |                       |          |                       |          |
| Hispanic                         | 488               | 124      | 577                   | 130      | 573                   | 128      | 562                   | 130      | 567                   | 127      | 565                   | 129      |
| Non-Hispanic                     | 5,966             | 1,846    | 7,223                 | 1,908    | 7,227                 | 1,910    | 7,238                 | 1,908    | 7,233                 | 1,911    | 7,235                 | 1,909    |
| Unknown                          | 1,346             | 68       |                       |          |                       |          |                       |          |                       |          |                       |          |
| <b>Sex</b>                       |                   |          |                       |          |                       |          |                       |          |                       |          |                       |          |
| Male                             | 4,257             | 821      | 4,259                 | 821      | 4,258                 | 821      | 4,258                 | 821      | 4,259                 | 821      | 4,259                 | 821      |
| Female                           | 3,541             | 1,217    | 3,541                 | 1,217    | 3,542                 | 1,217    | 3,542                 | 1,217    | 3,541                 | 1,217    | 3,541                 | 1,217    |
| Unknown                          | 2                 | 0        |                       |          |                       |          |                       |          |                       |          |                       |          |
| <b>Age Category</b>              |                   |          |                       |          |                       |          |                       |          |                       |          |                       |          |
| 0-2                              | 344               | 78       | 344                   | 78       | 344                   | 78       | 344                   | 78       | 344                   | 78       | 344                   | 78       |
| >2-5                             | 216               | 11       | 216                   | 11       | 216                   | 11       | 216                   | 11       | 216                   | 11       | 216                   | 11       |
| >5-13                            | 468               | 34       | 468                   | 34       | 468                   | 34       | 468                   | 34       | 468                   | 34       | 468                   | 34       |
| >13-18                           | 403               | 15       | 403                   | 15       | 403                   | 15       | 403                   | 15       | 403                   | 15       | 403                   | 15       |
| 19-25                            | 425               | 52       | 425                   | 52       | 425                   | 52       | 425                   | 52       | 425                   | 52       | 425                   | 52       |
| >25-45                           | 1,941             | 362      | 1,942                 | 362      | 1,942                 | 362      | 1,942                 | 362      | 1,942                 | 362      | 1,941                 | 362      |
| >45-65                           | 2,493             | 833      | 2,493                 | 833      | 2,493                 | 833      | 2,494                 | 833      | 2,494                 | 833      | 2,494                 | 833      |
| >65                              | 1,508             | 653      | 1,509                 | 653      | 1,509                 | 653      | 1,508                 | 653      | 1,508                 | 653      | 1,509                 | 653      |
| Unknown                          | 2                 | 0        |                       |          |                       |          |                       |          |                       |          |                       |          |

**Supplemental Table 2.** Demographics of pediatric and adult *S. aureus* incidents by methicillin sensitivity based on multiple imputation

|                                      | Pediatric        |                 |                   |         | Adult            |                   |                   |         |                |
|--------------------------------------|------------------|-----------------|-------------------|---------|------------------|-------------------|-------------------|---------|----------------|
|                                      | All<br>(n=1,569) | MRSA<br>(n=557) | MSSA<br>(n=1,012) | P value | All<br>(n=8,269) | MRSA<br>(n=3,637) | MSSA<br>(n=4,632) | P value | All<br>P value |
| <b>Individual Level, No. (%)</b>     |                  |                 |                   |         |                  |                   |                   |         |                |
| <b>County</b>                        |                  |                 |                   | 0.05    |                  |                   |                   | <0.001  | <0.001         |
| Clayton                              | 147 (9.4)        | 62 (11.1)       | 85 (8.4)          |         | 664 (8.0)        | 326 (9.0)         | 338 (7.3)         |         |                |
| Cobb                                 | 408 (26.0)       | 135 (24.2)      | 273 (27.0)        |         | 1,864 (22.5)     | 810 (22.3)        | 1,054 (22.8)      |         |                |
| DeKalb                               | 332 (21.2)       | 113 (20.3)      | 219 (21.6)        |         | 1,440 (17.4)     | 603 (16.6)        | 837 (18.1)        |         |                |
| Douglas                              | 63 (4.0)         | 31 (5.6)        | 32 (3.2)          |         | 520 (6.3)        | 267 (7.3)         | 253 (5.5)         |         |                |
| Fulton                               | 266 (17.0)       | 101 (18.1)      | 165 (16.3)        |         | 1,752 (21.2)     | 794 (21.8)        | 958 (20.7)        |         |                |
| Gwinnett                             | 291 (18.5)       | 91 (16.3)       | 200 (19.8)        |         | 1,510 (18.3)     | 642 (17.7)        | 868 (18.7)        |         |                |
| Newton                               | 37 (2.4)         | 12 (2.2)        | 25 (2.5)          |         | 278 (3.4)        | 94 (2.6)          | 184 (4.0)         |         |                |
| Rockdale                             | 25 (1.6)         | 12 (2.2)        | 13 (1.3)          |         | 241 (2.9)        | 101 (2.8)         | 140 (3.0)         |         |                |
| <b>Race</b>                          |                  |                 |                   | <0.001  |                  |                   |                   | <0.001  | <0.001         |
| White                                | 595 (37.9)       | 176 (31.6)      | 419 (41.4)        |         | 4,107 (49.7)     | 1,733 (47.6)      | 2,374 (51.3)      |         |                |
| Black                                | 891 (56.8)       | 360 (64.6)      | 531 (52.5)        |         | 3,983 (48.2)     | 1,844 (50.7)      | 2,139 (46.2)      |         |                |
| Other                                | 83 (5.3)         | 21 (3.8)        | 62 (6.1)          |         | 179 (2.2)        | 60 (1.6)          | 119 (2.6)         |         |                |
| <b>Ethnicity</b>                     |                  |                 |                   | <0.001  |                  |                   |                   | 0.003   | <0.001         |
| Non-Hispanic                         | 1,319 (84.1)     | 495 (88.9)      | 824 (81.4)        |         | 7,827 (94.7)     | 3,473 (95.5)      | 4,354 (94.0)      |         |                |
| Hispanic                             | 250 (15.9)       | 62 (11.1)       | 188 (18.6)        |         | 442 (5.3)        | 164 (4.5)         | 278 (6.0)         |         |                |
| <b>Gender</b>                        |                  |                 |                   | 0.18    |                  |                   |                   | 0.24    | 0.002          |
| Female                               | 753 (48.0)       | 280 (50.3)      | 473 (46.6)        |         | 3,610 (43.7)     | 1,614 (44.4)      | 1,996 (43.1)      |         |                |
| Male                                 | 816 (52.0)       | 277 (49.7)      | 539 (53.3)        |         | 4,659 (56.3)     | 2,023 (55.6)      | 2,636 (56.9)      |         |                |
| <b>Census Tract Level, Mean (SD)</b> |                  |                 |                   |         |                  |                   |                   |         |                |
| Income Inequality Index              | 0.41 (0.05)      | 0.41 (0.06)     | 0.41 (0.05)       | 0.68    | 0.41 (0.05)      | 0.42 (0.05)       | 0.41 (0.05)       | 0.32    | 0.35           |
| Crowding, No. (%)                    |                  |                 |                   | 0.01    |                  |                   |                   | <0.001  | 0.19           |
| Yes                                  | 1,319 (84.1)     | 486 (87.3)      | 833 (82.3)        |         | 6,840 (82.7)     | 3,076 (84.6)      | 3,764 (81.3)      |         |                |
| Racial Ethnic Concentration, No. (%) |                  |                 |                   | <0.001  |                  |                   |                   | 0.64    | 0.86           |
| > 47.8%                              | 793 (50.5)       | 322 (57.8)      | 471 (46.5)        |         | 4,200 (50.8)     | 1,858 (51.1)      | 2,342 (50.6)      |         |                |
| Proportion No High School Diploma    | 0.13 (0.10)      | 0.14 (0.09)     | 0.13 (0.10)       | 0.23    | 0.12 (0.09)      | 0.13 (0.09)       | 0.12 (0.09)       | 0.06    | <0.001         |
| Poverty Concentration, No. (%)       |                  |                 |                   | 0.12    |                  |                   |                   | 0.35    | 0.46           |
| > 40%                                | 60 (3.8)         | 27 (4.9)        | 33 (3.3)          |         | 285 (3.5)        | 133 (3.7)         | 152 (3.3)         |         |                |
| Proportion No Health Insurance       | 0.18 (0.10)      | 0.18 (0.10)     | 0.18 (0.10)       | 0.10    | 0.16 (0.09)      | 0.17 (0.09)       | 0.16 (0.09)       | 0.09    | <0.001         |
| Proportion Under 18 years-old        | 0.26 (0.05)      | 0.26 (0.05)     | 0.26 (0.05)       | 0.24    | 0.25 (0.06)      | 0.25 (0.06)       | 0.25 (0.06)       | 0.85    | <0.001         |
| Proportion Foreign-Born              | 0.17 (0.12)      | 0.15 (0.12)     | 0.17 (0.13)       | 0.02    | 0.15 (0.11)      | 0.15 (0.11)       | 0.15 (0.11)       | 0.82    | <0.001         |

**Supplemental Table 3. Multilevel model for SSTI MRSA compared to MSSA by pediatric and adult incidents**

| Variable                    | Pediatric            |         | Adult                |         |
|-----------------------------|----------------------|---------|----------------------|---------|
|                             | Adjusted OR (95% CI) | P value | Adjusted OR (95% CI) | P value |
| Age <sup>a</sup>            |                      |         |                      |         |
| Level 1                     | Referent             |         | Referent             |         |
| Level 2                     | 1.00 (0.69, 1.45)    | 0.99    | 1.24 (0.97, 1.60)    | 0.08    |
| Level 3                     | 0.53 (0.39, 0.73)    | <0.001  | 0.96 (0.75, 1.23)    | 0.75    |
| Level 4                     | 0.63 (0.45, 0.87)    | 0.005   | 1.33 (1.03, 1.73)    | 0.03    |
| Gender                      |                      |         |                      |         |
| Female                      | Referent             |         | Referent             |         |
| Male                        | 0.93 (0.73, 1.17)    | 0.53    | 1.03 (0.92, 1.16)    | 0.61    |
| Race                        |                      |         |                      |         |
| White                       | Referent             |         | Referent             |         |
| Black                       | 1.09 (0.77, 1.54)    | 0.62    | 1.09 (0.95, 1.24)    | 0.22    |
| Other                       | 0.61 (0.30, 1.23)    | 0.16    | 0.63 (0.40, 0.98)    | 0.04    |
| Ethnicity                   |                      |         |                      |         |
| Non-Hispanic                | Referent             |         | Referent             |         |
| Hispanic                    | 0.63 (0.43, 0.94)    | 0.02    | 0.75 (0.56, 0.99)    | 0.05    |
| Crowding                    |                      |         |                      |         |
| No                          | Referent             |         | Referent             |         |
| Yes                         | 1.44 (1.02, 2.04)    | 0.04    | 1.35 (1.14, 1.59)    | <0.001  |
| Racial Ethnic Concentration |                      |         |                      |         |
| ≤ 47.8%                     | Referent             |         |                      |         |
| > 47.8%                     | 1.19 (0.90, 1.58)    | 0.22    |                      |         |
| Proportion No HS Diploma    |                      |         | 2.98 (1.35, 6.56)    | 0.007   |
| Proportion Foreign-Born     | 0.55 (0.18, 1.63)    | 0.28    | 0.63 (0.34, 1.18)    | 0.15    |

<sup>a</sup> Pediatric: Level 1 = 0-2 years, Level 2 = >2-5 years, Level 3 = >5-13 years, Level 4 = >13-18 years (inclusive); Adult: Level 1 = 19-25 years (inclusive), Level 2 = >25-45 years, Level 3 = >45-65 years, Level 4 = 65+ years (non-inclusive)
